# Supplementary material
Source: HighWire-hosted journal article supplement (https://gpsych.bmj.com/content/32/3/e100043)
Supplement: inline-supplementary-material-1 [file inline-supplementary-material-1.docx]

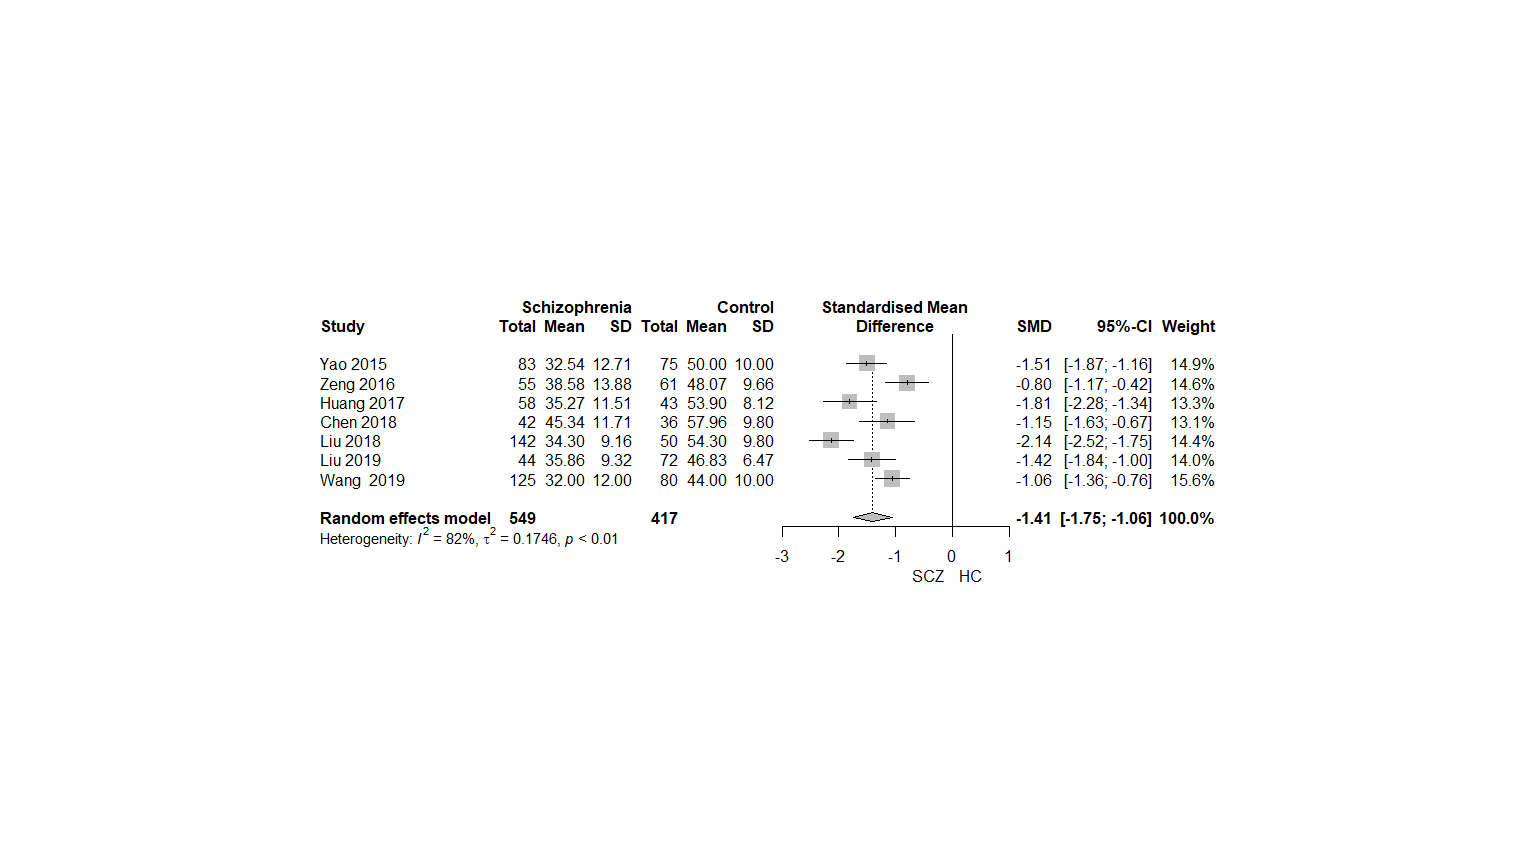


**Fig.A.1** Speed of processing score comparison between patients with FES and HCs


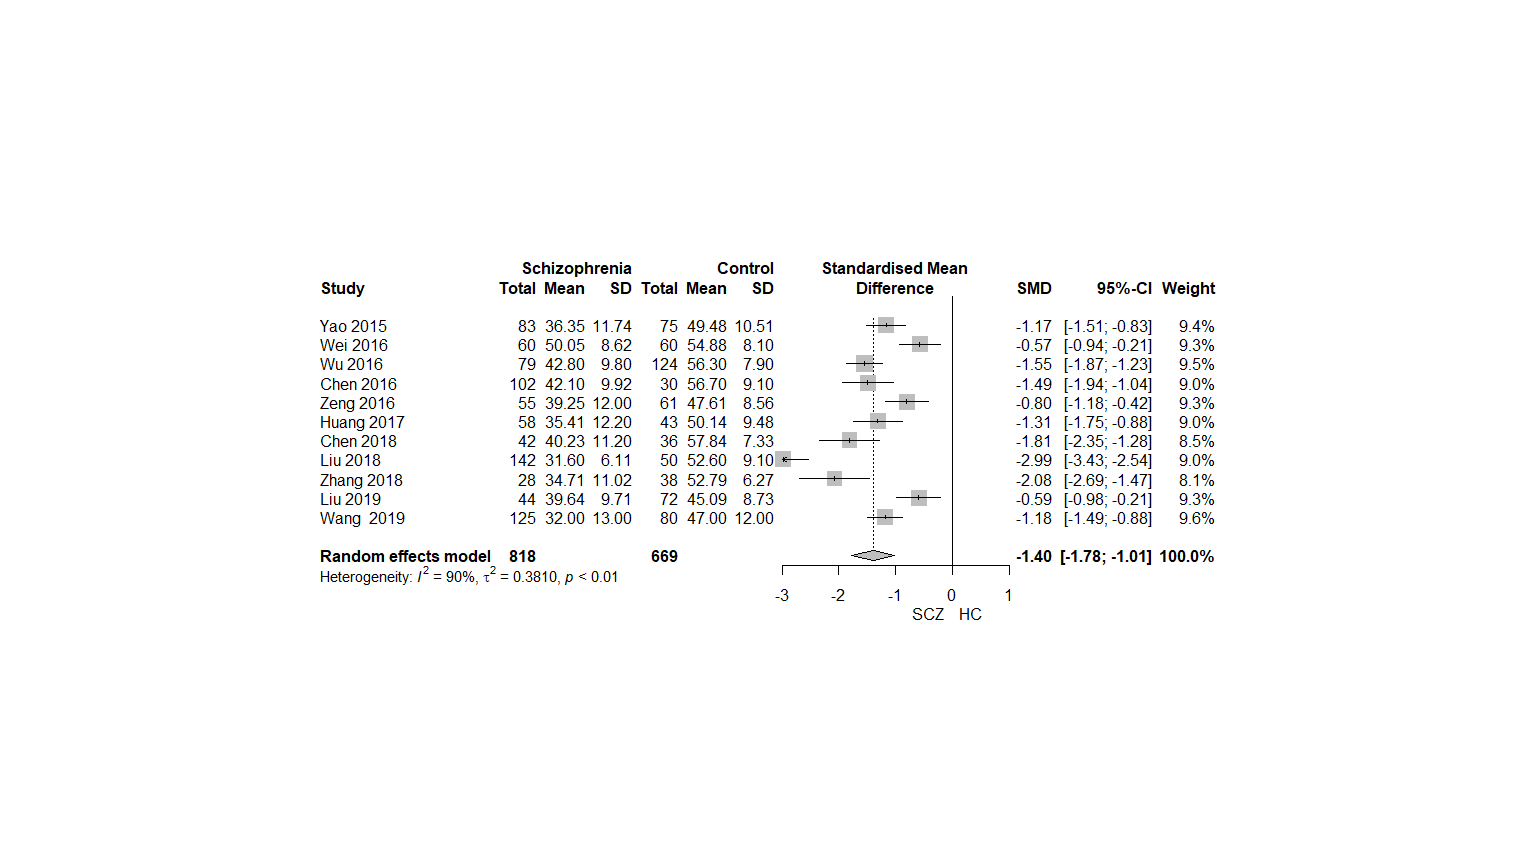


**Fig.A.2** Attention and vigilance score comparison between patients with FES and HCs


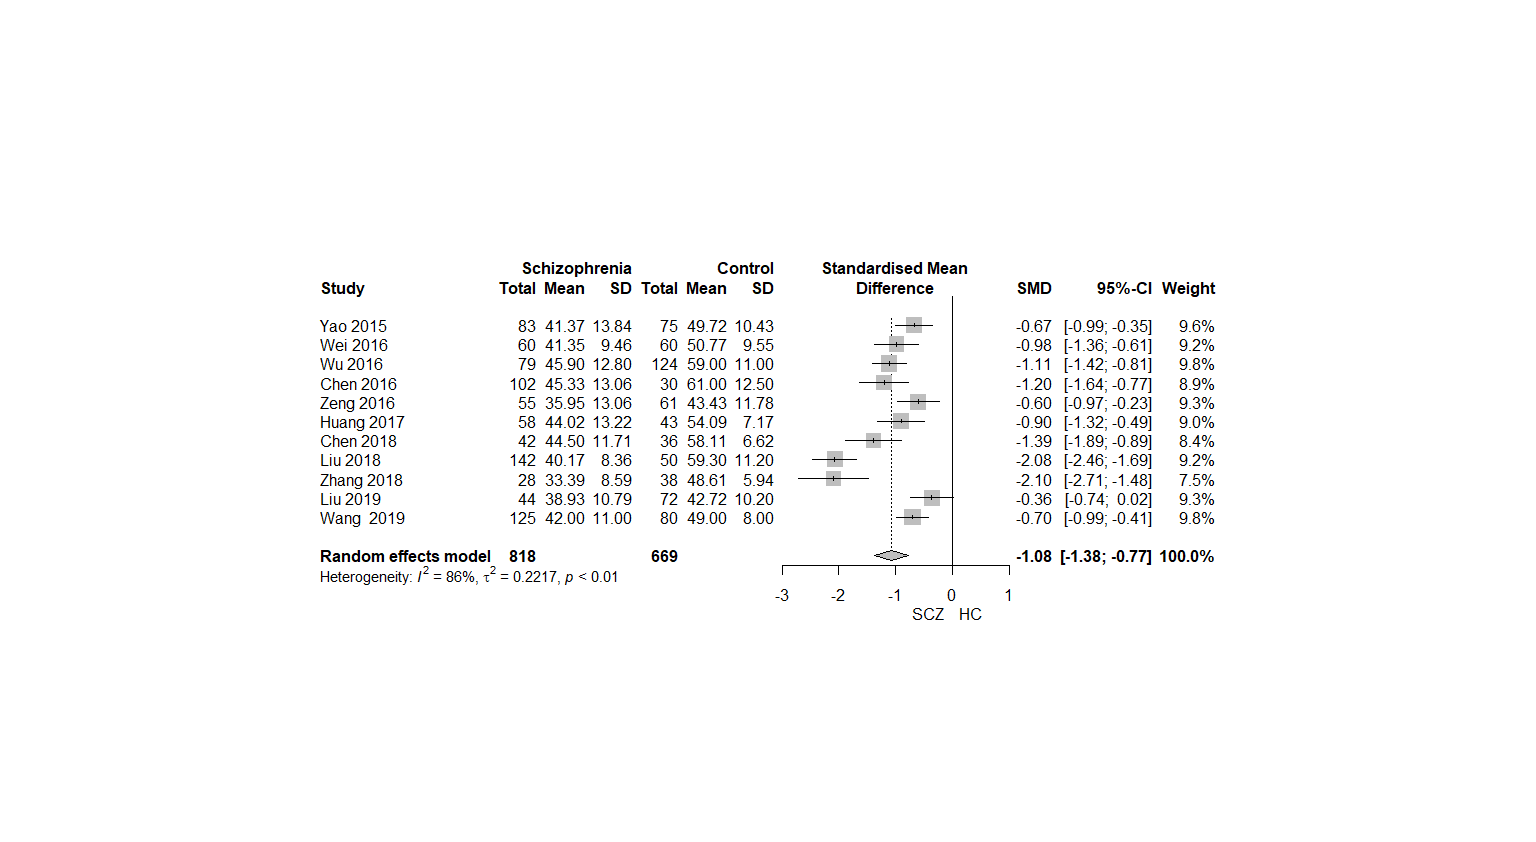


**Fig.A.3** Working memory domain comparison between patients with FES and HCs


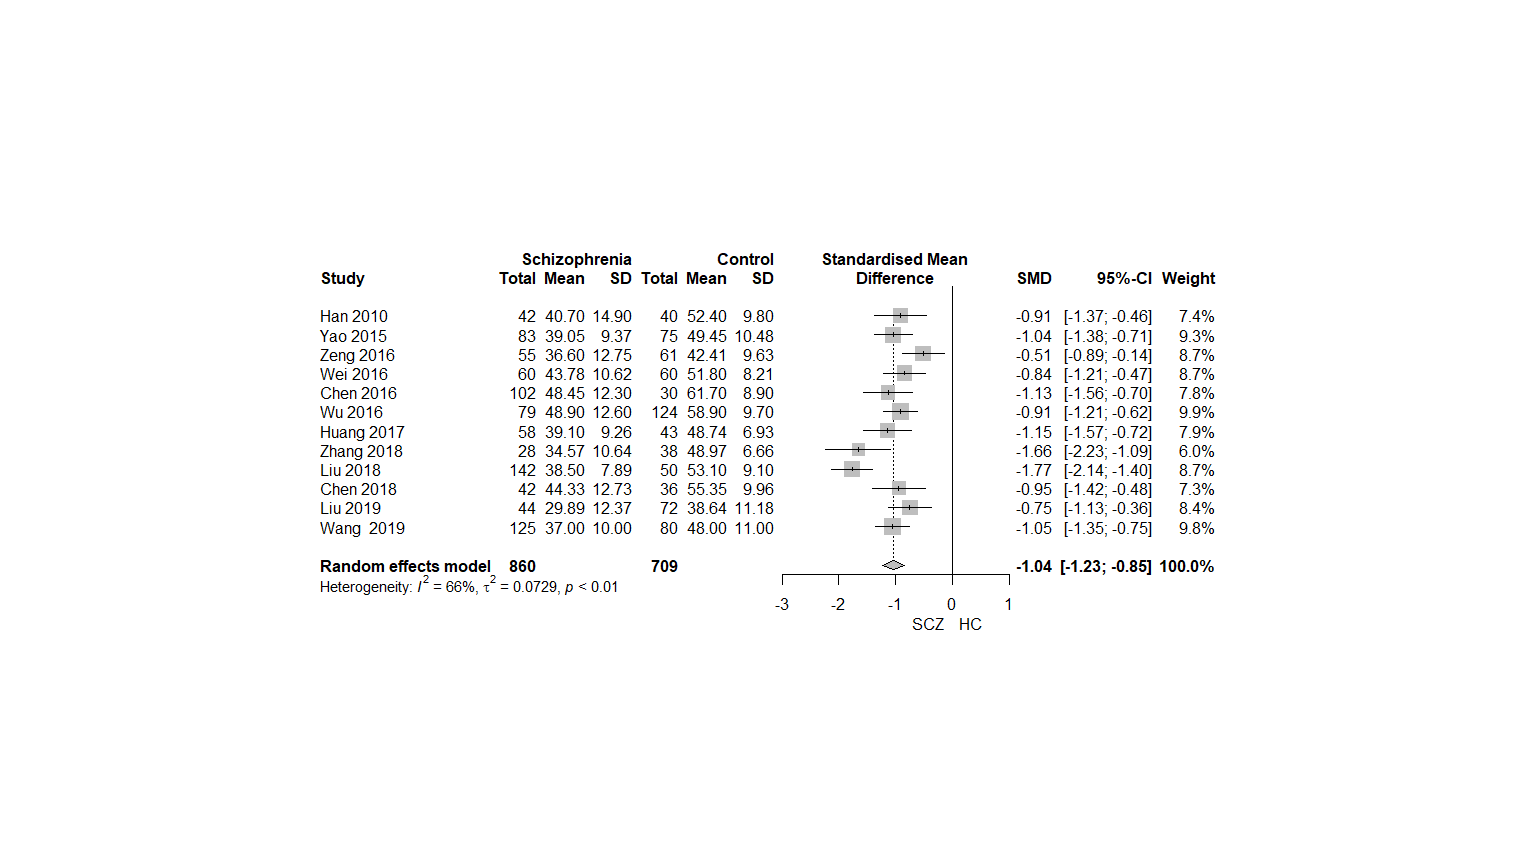


**Fig.A.4** Verbal learning domain score comparison between patients with FES and HC


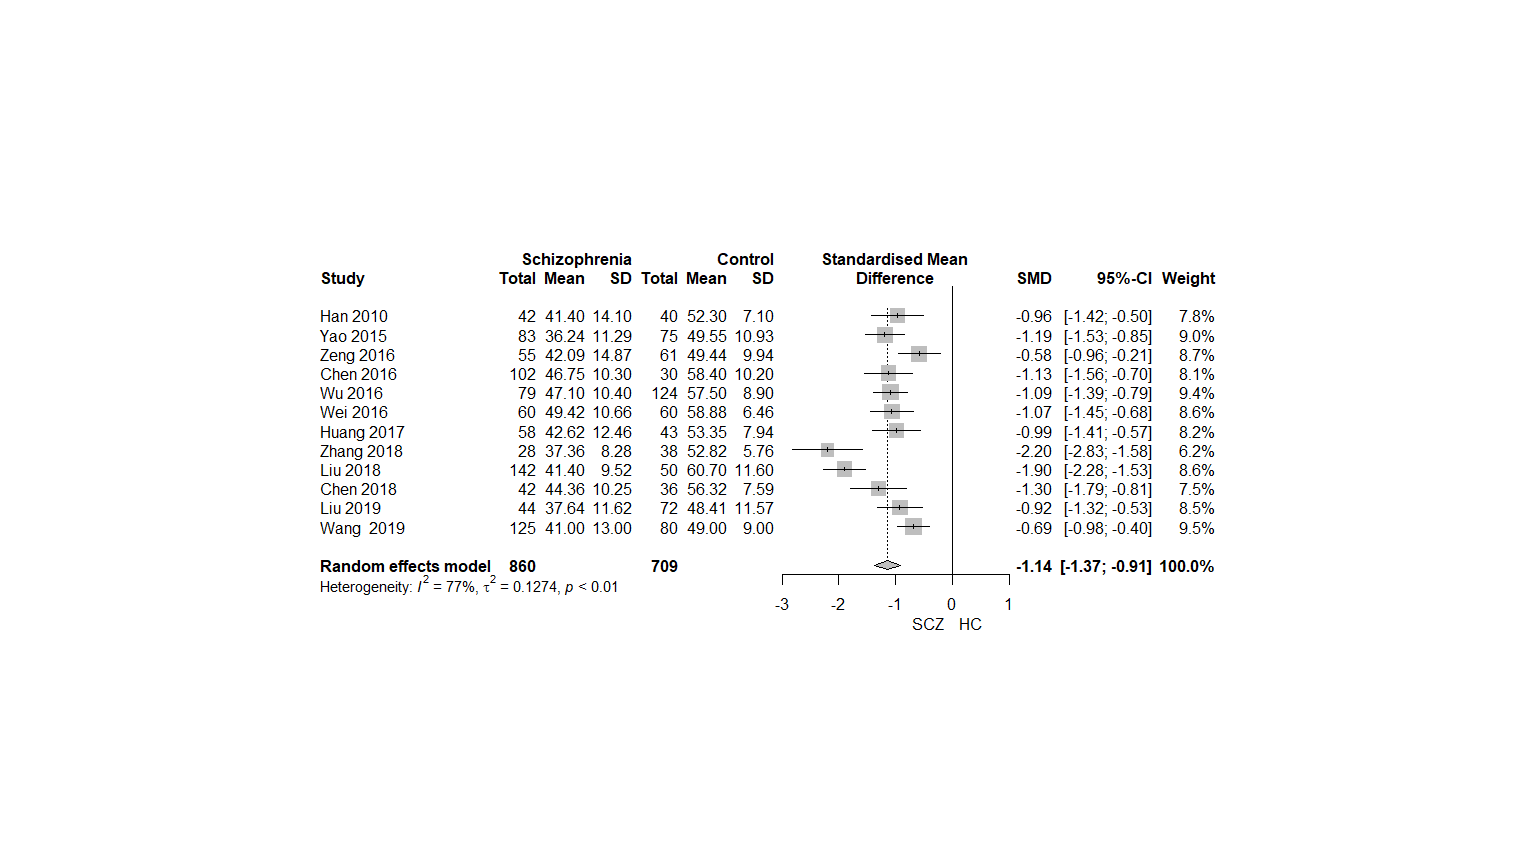


**Fig.A.5** Visual learning domain score comparison between patients with FES and HC


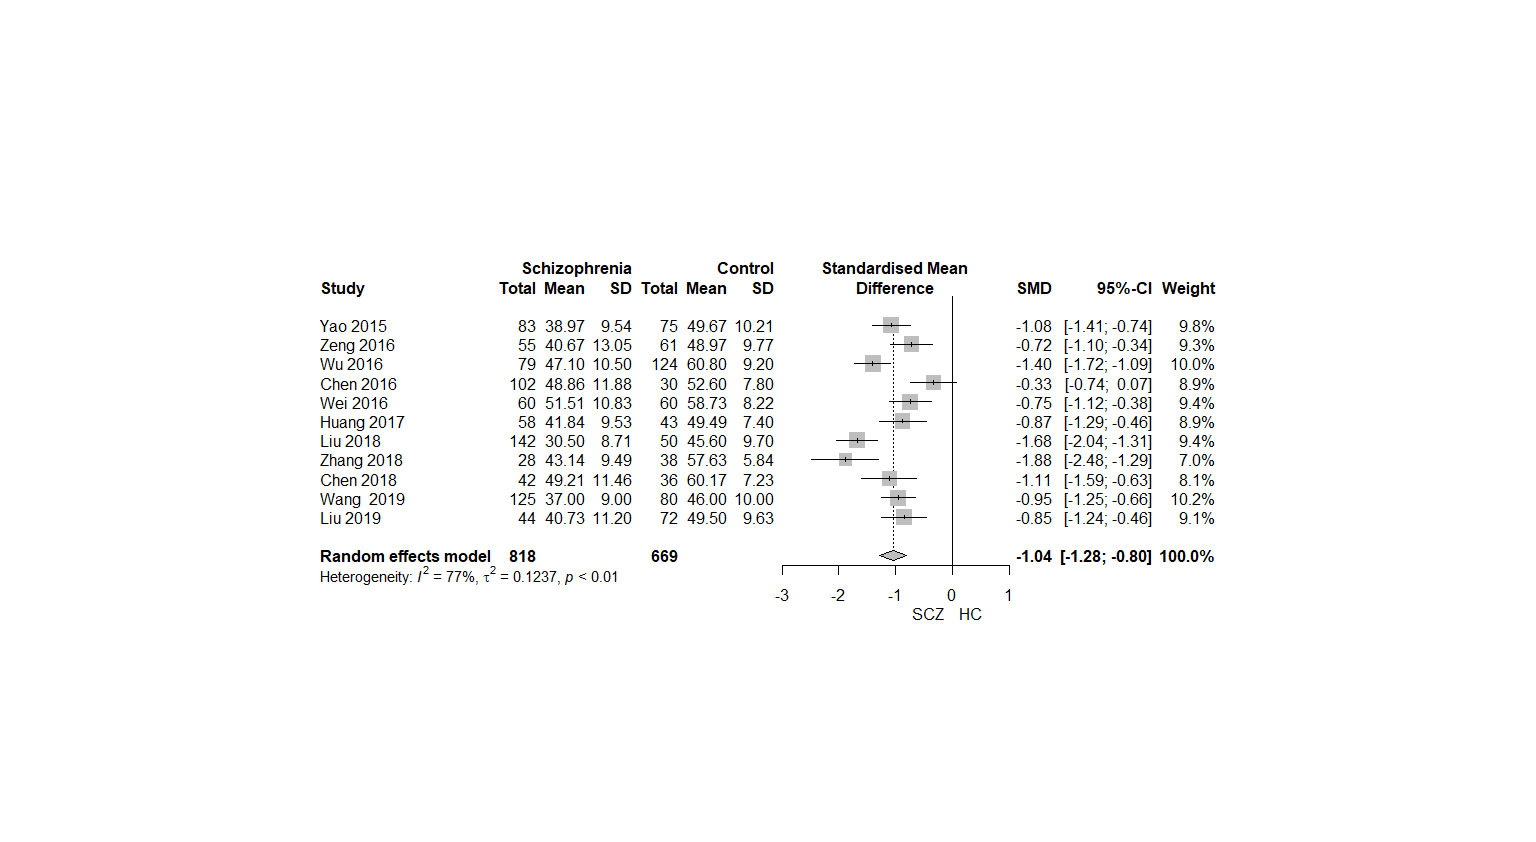


**Fig.A.6** Problem solving domain score comparison between patients with FES and HCs


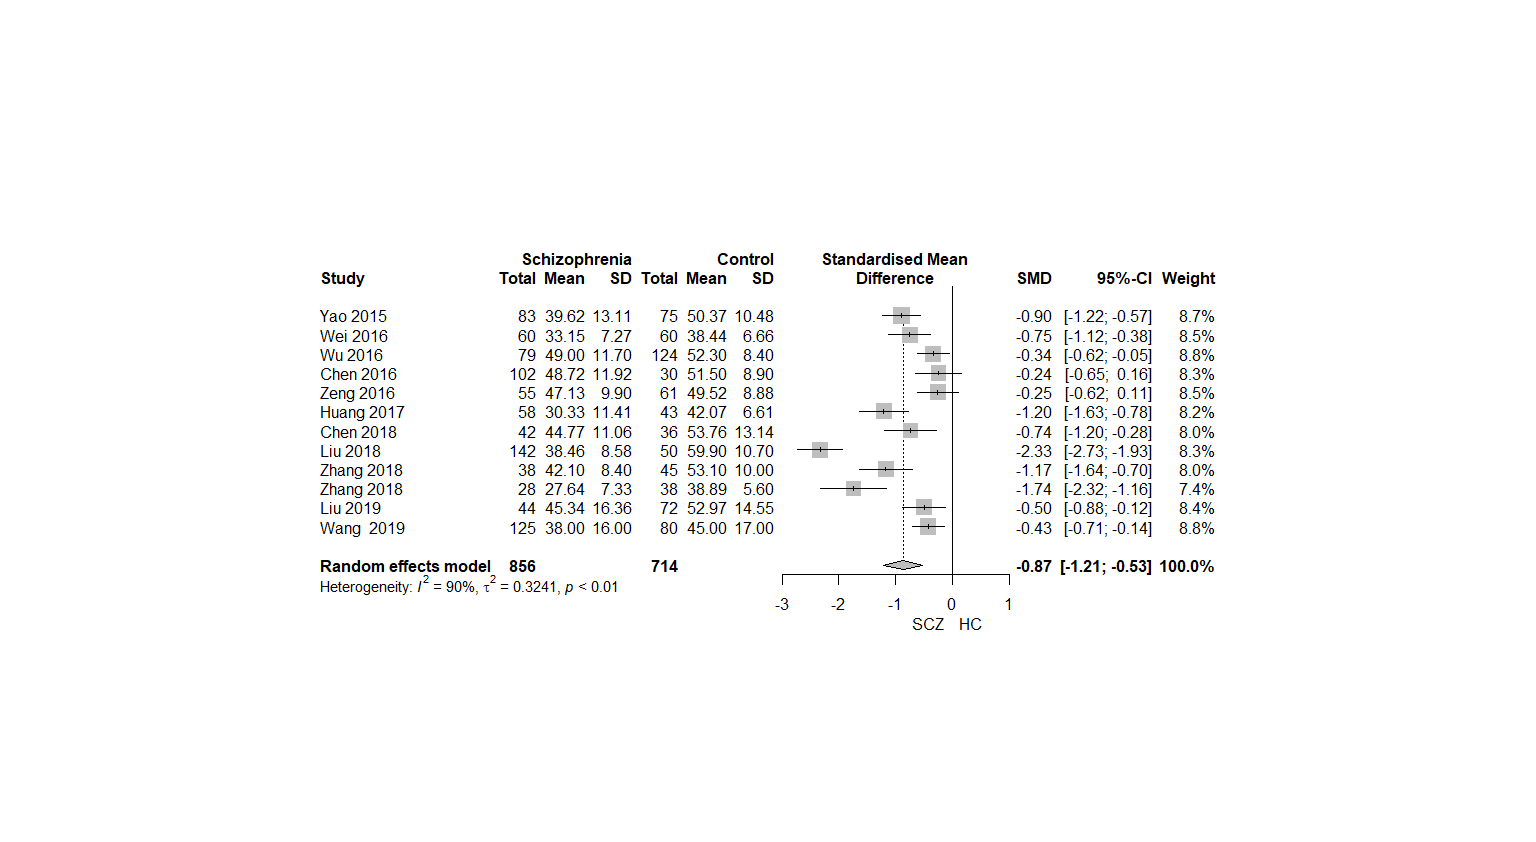


**Fig.A.7** Social cognition domain score comparison between patients with FES and HCs


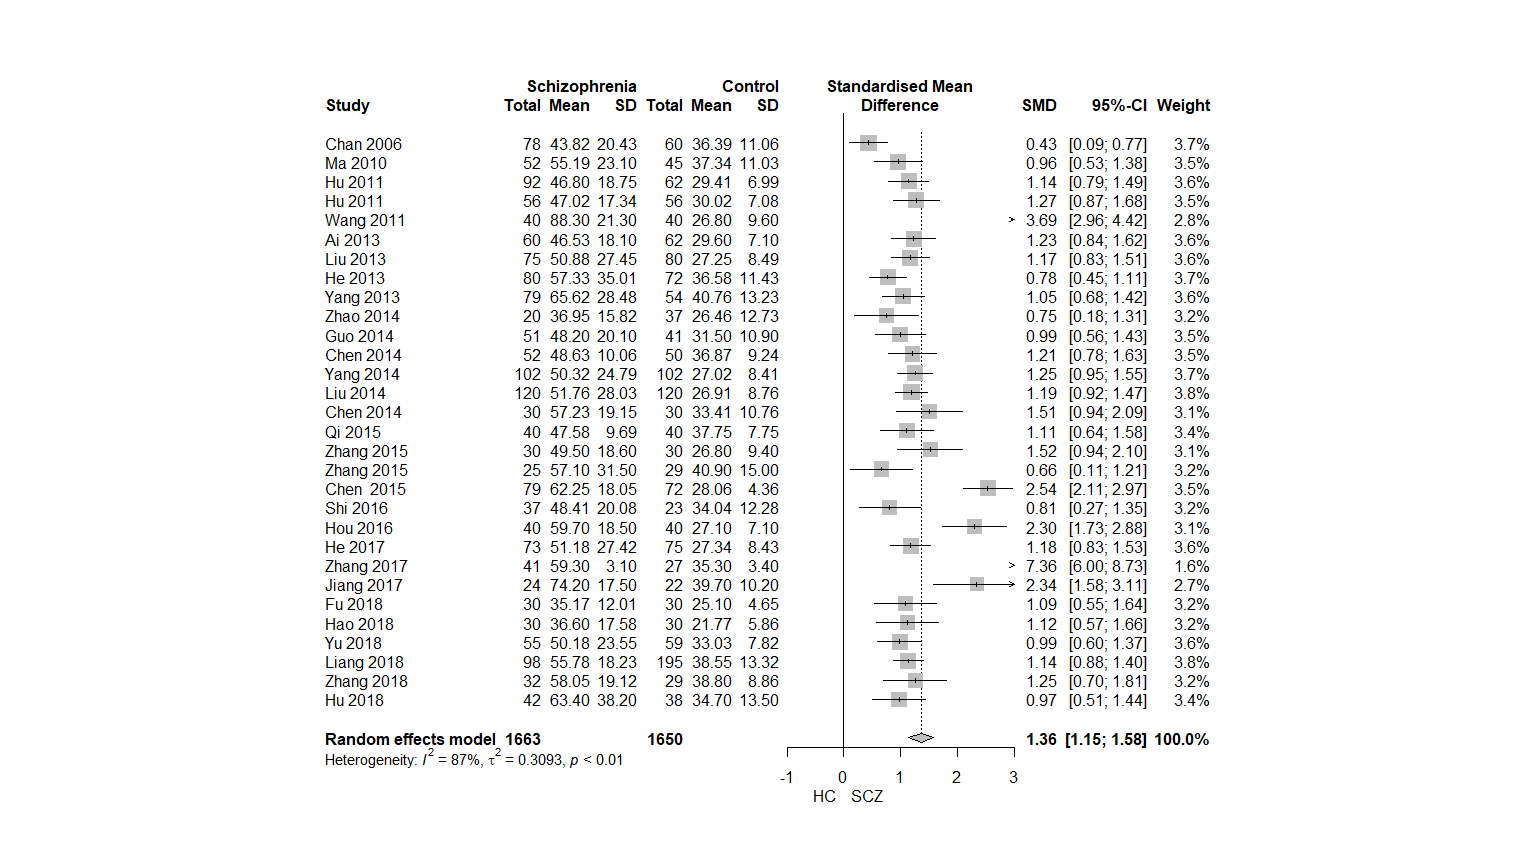


**Fig.A.8** Trail making test score (completion time) comparison between patients with FES and HCs


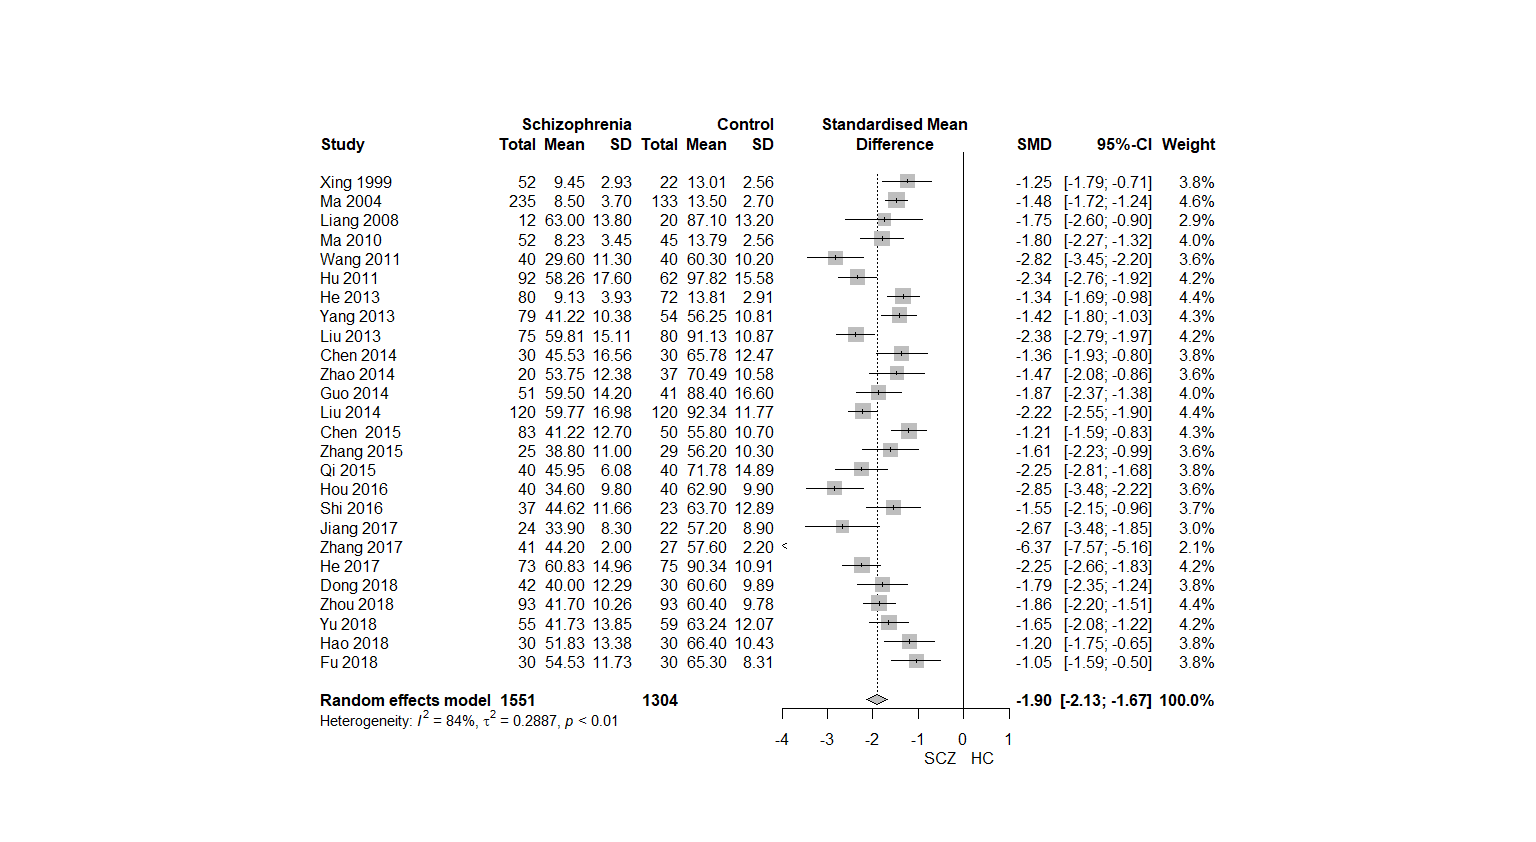


**Fig.A.9** Symbol Coding test score comparison between patients with FES and HCs


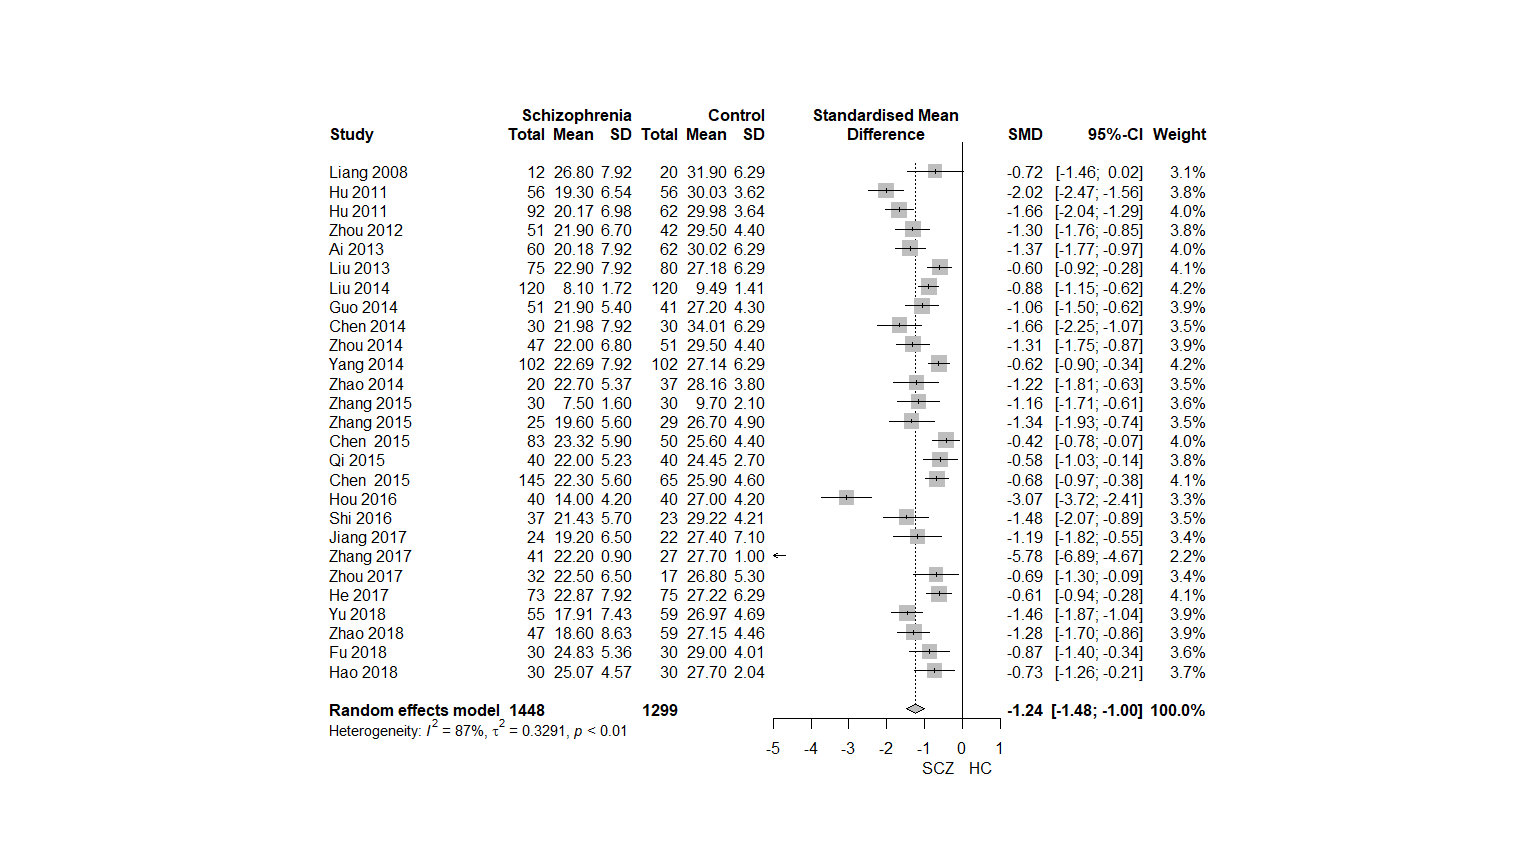


**Fig.A.10** HVLT-R score comparison between patients with FES and HCs


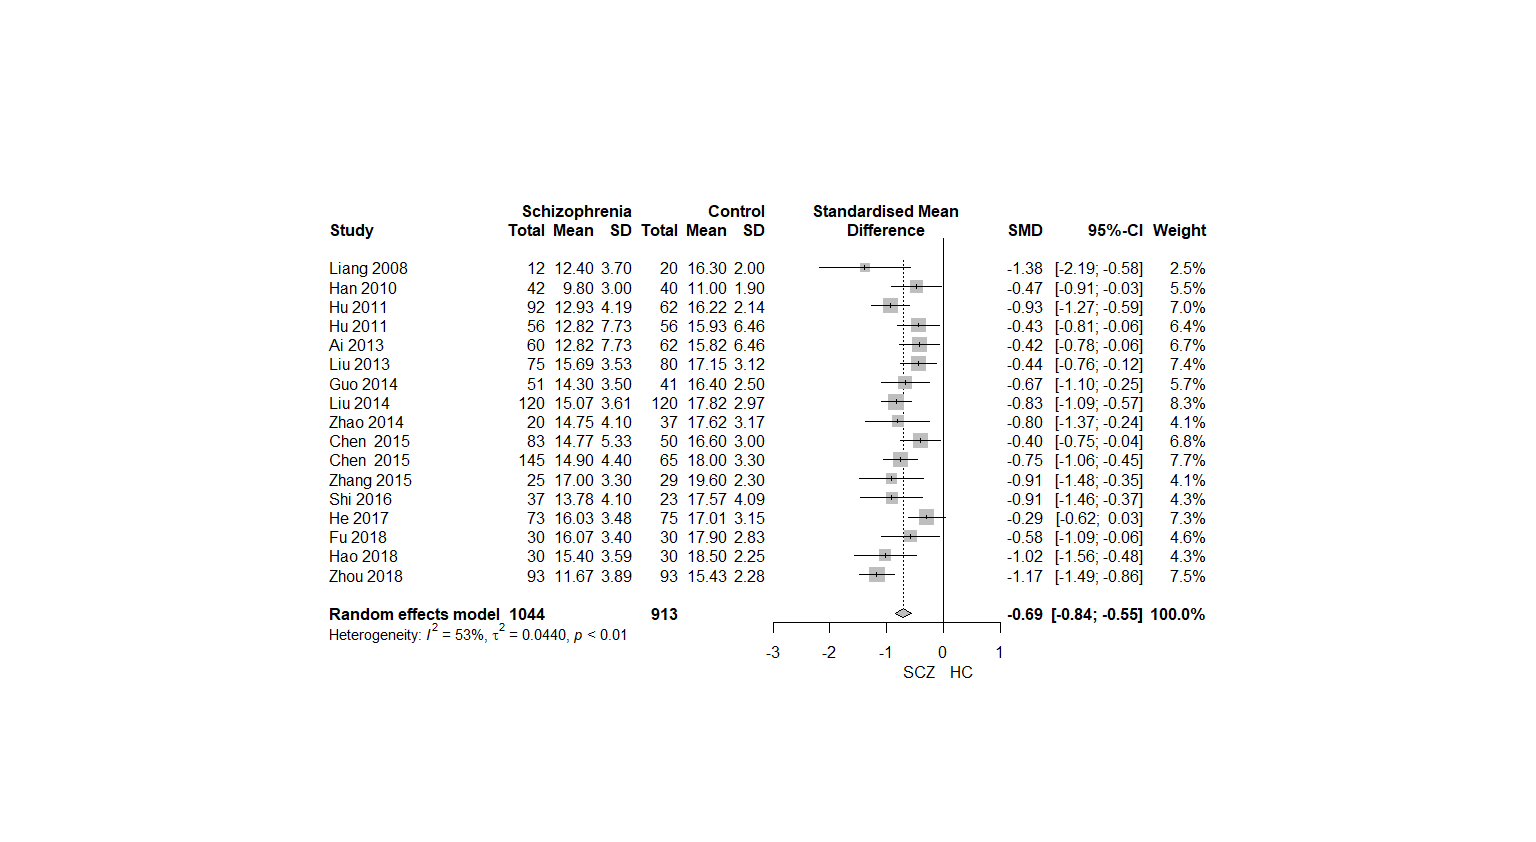


**Fig.A.11** Spatial span score comparison between patients with FES and HCs


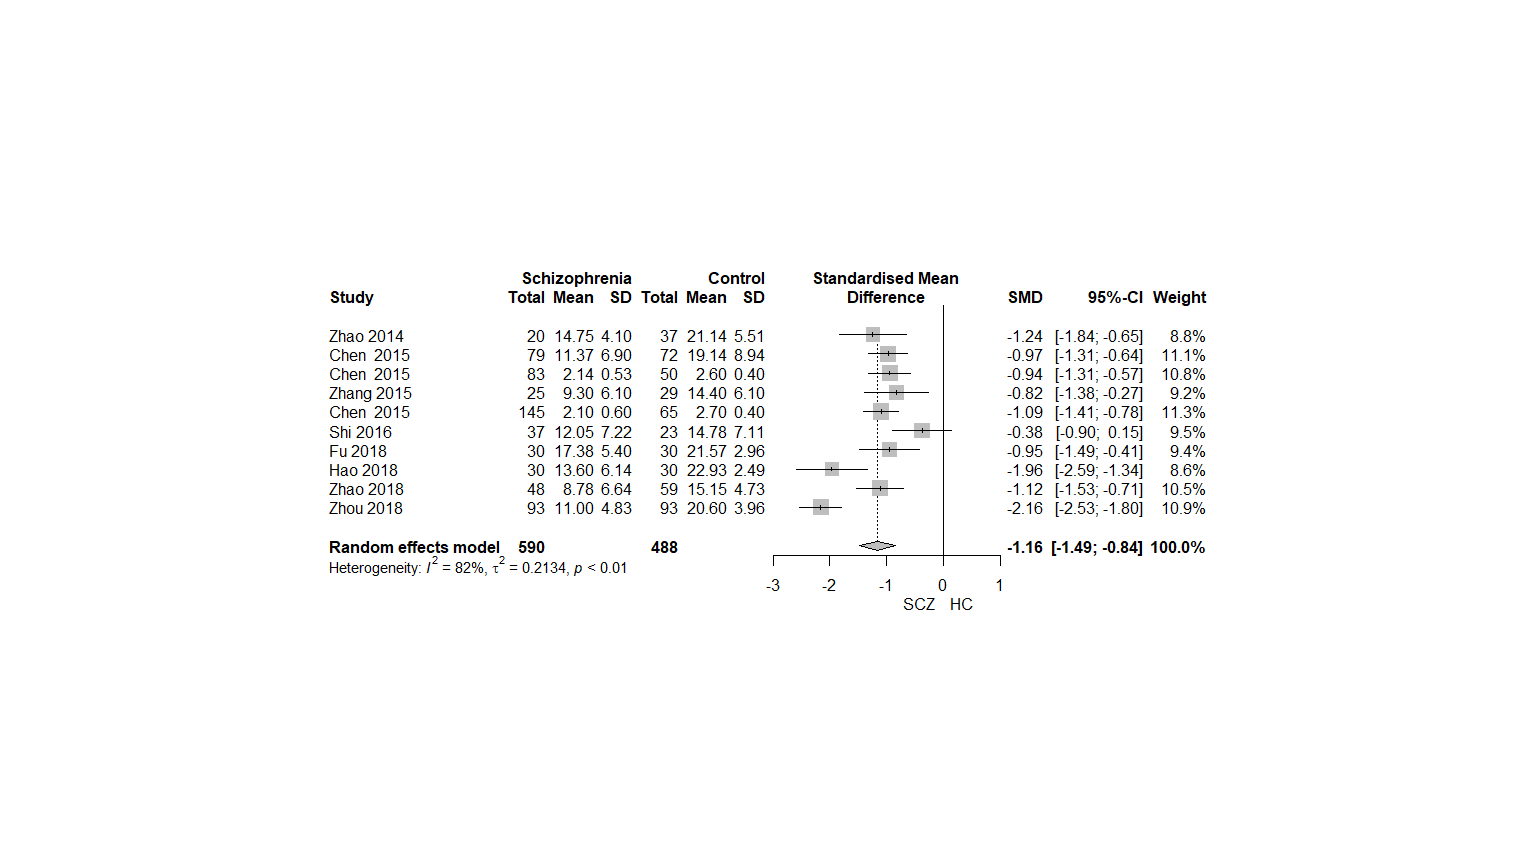


**Fig.A.12** Mazes score comparison between patients with FES and HCs


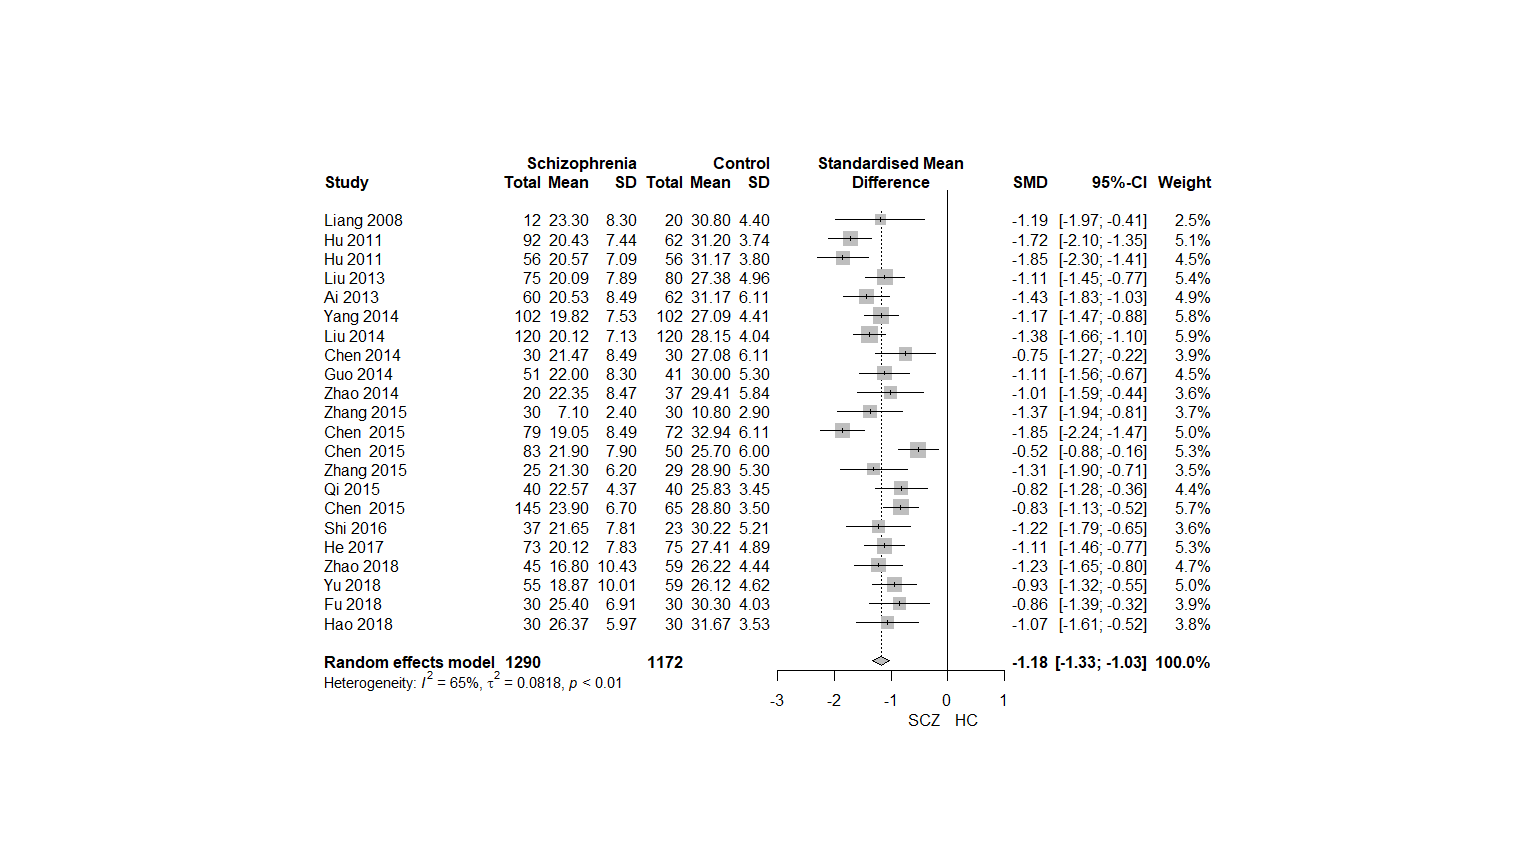


**Fig.A.13** BVMT score comparison between patients with FES and HCs


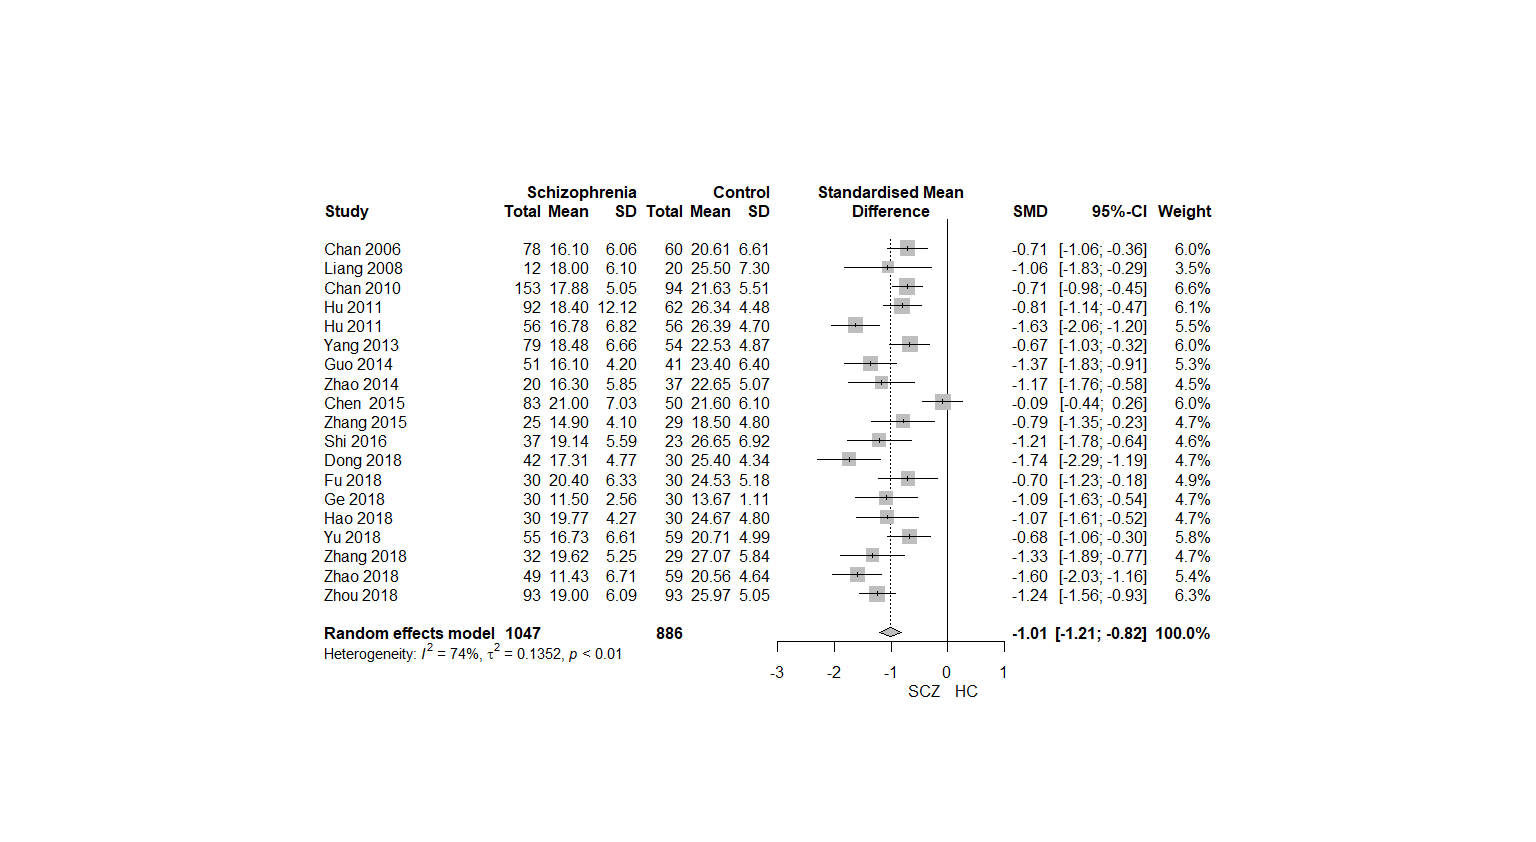


**Fig.A.14** Category fluency score comparison between patients with FES and HCs


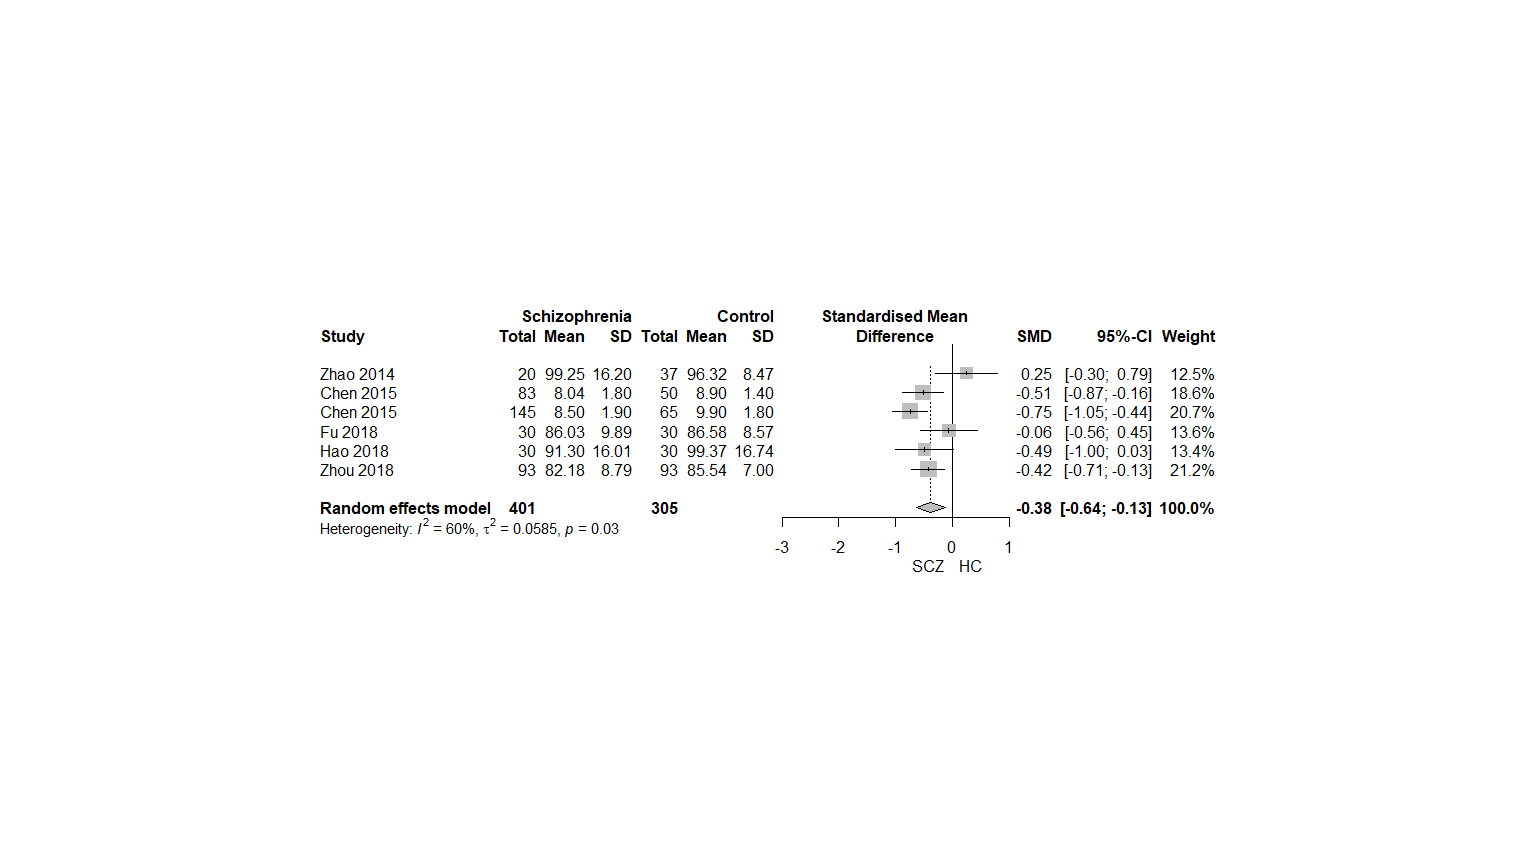


**Fig.A.15** MSCEIT test score comparison between patients with FES and HCs


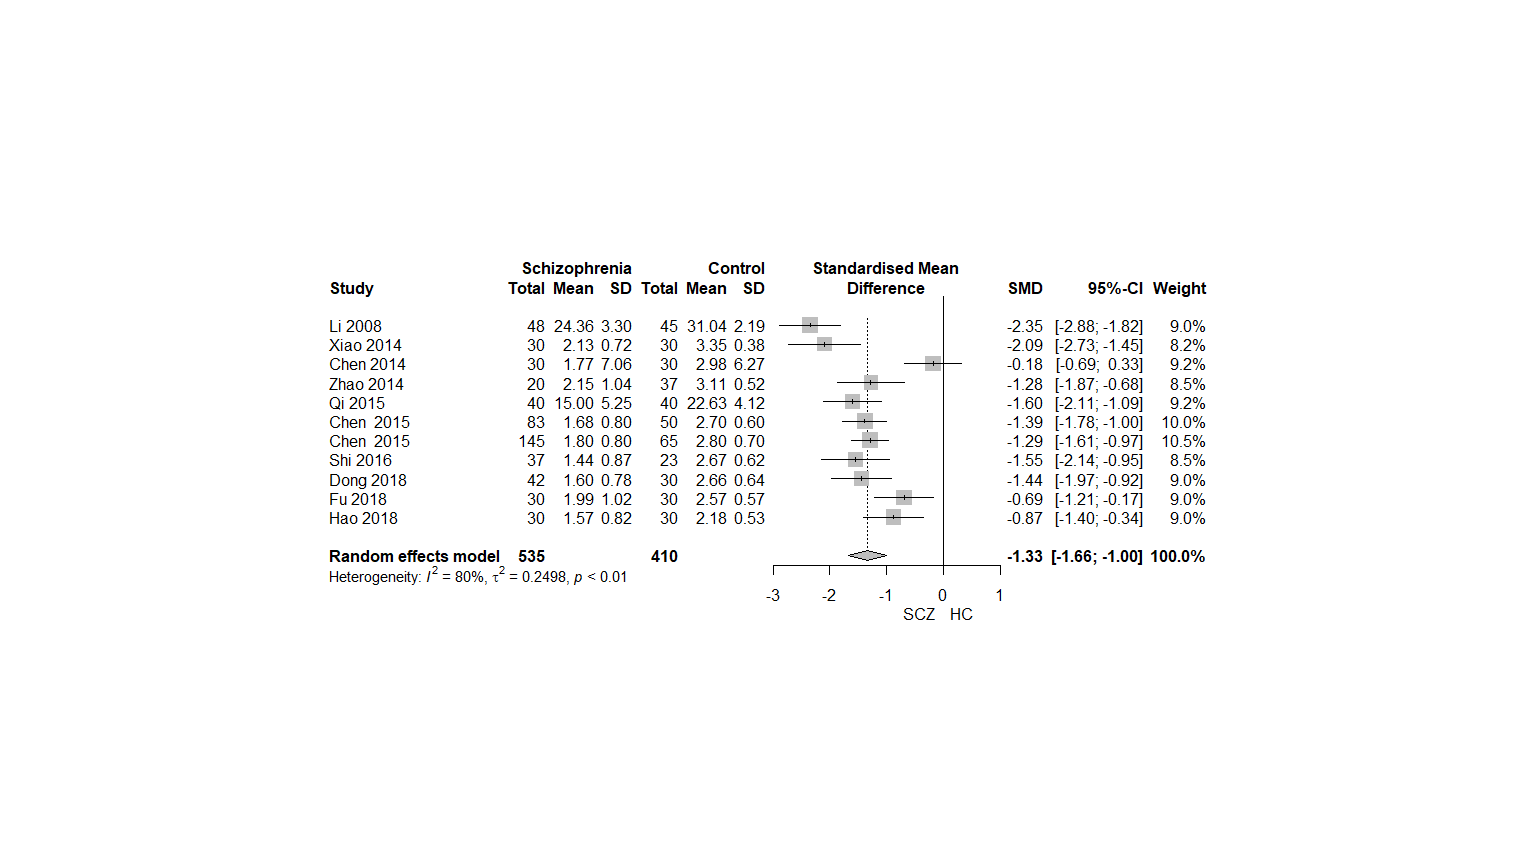


**Fig.A.16** CPT-IP score comparison between patients with FES and HCs
